# Supplementary material
Source: HighWire-hosted journal article supplement (https://bmjopen.bmj.com/content/12/9/e054491)
Supplement: inline-supplementary-material-3 [file inline-supplementary-material-3.pdf]

| Search in Pubmed/Medline 7th of august 2020 | Search word                                                                                                                                                                                                                                                                                                                                                                                                                                                                                                                                                                                                                                                                                                                                                                                                                                                                                                                                                                                                                                                                                                                                                                                                                       |
|---------------------------------------------|-----------------------------------------------------------------------------------------------------------------------------------------------------------------------------------------------------------------------------------------------------------------------------------------------------------------------------------------------------------------------------------------------------------------------------------------------------------------------------------------------------------------------------------------------------------------------------------------------------------------------------------------------------------------------------------------------------------------------------------------------------------------------------------------------------------------------------------------------------------------------------------------------------------------------------------------------------------------------------------------------------------------------------------------------------------------------------------------------------------------------------------------------------------------------------------------------------------------------------------|
| Neonatal                                    | ((("Infant, Newborn"[Mesh] OR "Neonatology"[Mesh])) OR ((infant*[Text Word] OR newborn*[Text Word] OR neonate*[Text Word] OR neonatal*[Text Word] OR toddler*[Text Word] OR baby[Text Word] OR babies[Text Word] OR paediatric[Text Word] OR pediatric[Text Word])))                                                                                                                                                                                                                                                                                                                                                                                                                                                                                                                                                                                                                                                                                                                                                                                                                                                                                                                                                              |
| Sepsis                                      | AND (((((((("Sepsis"[Mesh] OR "Meningitis"[Mesh] OR "Encephalitis"[Mesh] OR "Arthritis"[Mesh] OR "Osteomyelitis"[Mesh] OR "Urinary Tract Infections"[Mesh])) OR ((septicaemia[Text Word] OR sepsis[Text Word] OR septicemia[Text Word] OR pneumoni*[Text Word] OR meningitis[Text Word] OR meningoenephalitis[Text Word] OR encephalitis[Text Word] OR bone infection*[Text Word] OR arthritis[Text Word] OR osteomyelitis[Text Word] OR urinary tract infection*[Text Word] OR urethritis[Text Word] OR cystitis[Text Word] OR bacteriuria[Text Word] OR bacteremia[Text Word] OR pyogen[Text Word] OR epididymitis[Text Word] OR prostatitis[Text Word] OR "vesicoureteral reflux"[Text Word] OR pyuria[Text Word] OR trigonitis[Text Word] OR pyelonephritis[Text Word] OR pyonephrosis[Text Word] OR hydronephrosis[Text Word] OR urinary infection*[Text Word] OR "lung infection"[Text Word] OR respiratory tract infection*[Text Word] OR blood infection*[Text Word] OR brain infection*[Text Word] OR joint infection*[Text Word] OR malaria[Text Word])))                                                                                                                                                               |
| Risk factors                                | (((((("Risk"[Mesh] OR "Causality"[Mesh] OR "Association"[Mesh]) OR ("Risk" OR "Causality" OR "Association" OR determinant* OR predictor* OR causal OR association OR "odds ratio")) OR "Odds Ratio"[Mesh]))                                                                                                                                                                                                                                                                                                                                                                                                                                                                                                                                                                                                                                                                                                                                                                                                                                                                                                                                                                                                                       |
| Sub-Saharan Africa                          | AND (((("Africa South of the Sahara"[Mesh] OR ((Cameroon[Text Word] OR "Central African Republic"[Text Word] OR Chad[Text Word] OR Congo[Text Word] OR "Democratic Republic of the Congo"[Text Word] OR "Equatorial Guinea"[Text Word] OR Gabon[Text Word] OR "Sao Tome"[Text Word] OR Burundi[Text Word] OR Djibouti[Text Word] OR Eritrea[Text Word] OR Ethiopia[Text Word] OR Kenya[Text Word] OR Rwanda[Text Word] OR Somalia[Text Word] OR Sudan[Text Word] OR Tanzania[Text Word] OR Uganda[Text Word] OR Angola[Text Word] OR Botswana[Text Word] OR Eswatini[Text Word] OR Lesotho[Text Word] OR Malawi[Text Word] OR Mozambique[Text Word] OR Namibia[Text Word] OR "South Africa"[Text Word] OR Zambia[Text Word] OR Zimbabwe[Text Word] OR Benin[Text Word] OR "Burkina Faso"[Text Word] OR "Cabo Verde"[Text Word] OR "Cote d'Ivoire"[Text Word] OR Gambia[Text Word] OR Ghana[Text Word] OR Guinea[Text Word] OR "Guinea-Bissau"[Text Word] OR Liberia[Text Word] OR Mali[Text Word] OR Mauritania[Text Word] OR Niger[Text Word] OR Nigeria[Text Word] OR Senegal[Text Word] OR "Sierra Leone"[Text Word] OR Togo[Text Word]))) OR ((("Africa South of the Sahara"[Text Word] OR "sub-saharan africa"[Text Word]))) |

Filters:

Publication date: from 2010.01.01 to current date (07.08.2020)

Language: English
